# Supplementary material for: 5-HT1F Receptor Agonist Ameliorates Mechanical Allodynia in Neuropathic Pain via Induction of Mitochondrial Biogenesis and Suppression of Neuroinflammation
Source: Front Pharmacol. 2022 Mar 3;13:834570. doi: 10.3389/fphar.2022.834570 (PMC8927783; doi:10.3389/fphar.2022.834570)
Supplement: Supplementary file 1 [file DataSheet1.ZIP]

Archive with 6 entries (5 files):
- original blots/
- original blots/Fig 9A-B,M.pdf
- original blots/Fig. 1C-D.pdf
- original blots/Fig. 1E, Fig. 3A.pdf
- original blots/Fig. 7C-E and Fig. 9N-O.pdf
- original blots/Fig. 8B-D.pdf
